# Supplementary material for: Disparities in Avoidance Behaviours to Air Quality Information Disclosure Exacerbate Environmental Inequality
Source: Research Square preprint supplement (doi:10.21203/rs.3.rs-5907718/v1), 2025-02-03
Supplement: Supplementary file 1 [file b4e40368a224a10756283751.docx]

**Supplementary Information**

**Table of contents**

[A. Research Hypotheses 2](#_Toc1985754192)

[A.1 Air quality information triggers travel avoidance behaviours 2](#_Toc527346917)

[A.2 Unequal impact of air quality information 3](#_Toc454622850)

[B. China’s air quality monitoring program and the AQI 5](#_Toc99423924)

[C. Data characteristics 9](#_Toc275613302)

[C.1 Descriptive statistics 9](#_Toc110540135)

[C.2 Sample distribution characteristics 10](#_Toc274694290)

[D. Robustness tests 11](#_Toc1844574627)

[D.1 Covariate balance test 11](#_Toc691827897)

[D.2 Manipulation test 13](#_Toc1075000021)

[D.3 Local randomization approach to RD analysis 14](#_Toc745430736)

[E. Regression results 17](#_Toc34783354)

[F. Source of Data on Dissemination of Air Quality Information to the Public 20](#_Toc488278694)

[References 21](#_Toc964994871)

**A. Research Hypotheses**

**A.1 Air quality information triggers travel avoidance behaviours**

Environmental information disclosure is a fundamental measure of environmental governance. The disclosure of air quality information alleviates the gap between public perception and actual levels of air pollution1. For instance, particulate matter (PM) causes visible haze and respiratory discomfort, making it perceptible, whereas harmful gases, such as CO and NO2, are not easily detected by the public. Thus, air quality information disclosure helps the public make optimal behavioural decisions. Consequently, governments worldwide have adopted various measures, such as air pollution alerts, to disclose air pollution information to the public.

As part of the war against pollution, China has implemented an air quality monitoring program and has been disclosing air quality information since 2013. This air quality monitoring program deploys a nationwide network of monitoring equipment and provides a real-time Air Quality Index (AQI) to the public2. The AQI is a comprehensive index that represents the overall level of air pollution, based on which air quality can be divided into six different levels. Moreover, the program provides information on corresponding health hazards and recommended actions for each air quality category (Table B2).

Air quality information can raise awareness and willingness for self-protection3 and behavioural changes4. Air quality alerts, such as smog alerts, reduce outdoor activities and time spent outdoors5,6. In our context, the change in air quality is information that the public can easily notice. There is a dramatic change in the air quality category and health risks perceived by the public, on different sides of the cutoff, although air pollution changes slightly. For example, when the AQI is 99, the air quality level is “Good” and only a very small minority of exceptionally sensitive individuals are recommended to reduce outdoor activities. However, when the AQI reaches 101, the air quality level becomes “Lightly Polluted”. A broader group, including children, the elderly, and individuals with heart or respiratory diseases, is advised to reduce prolonged and high-intensity outdoor exercises, as shown in Table B2. Consequently, air quality could significantly trigger avoidance behaviours, including travel. Therefore, we propose the following hypothesis:

**Hypothesis 1:** Air pollution information triggers travel avoidance behaviours.

**A.2 Unequal impact of air quality information**

Although high AQI levels significantly increase people’s precaution intentions7-9, avoidance behaviours may differ based on income. Triggering avoidance behaviours using information may require both avoidance awareness and capability. Varying levels of environmental and health concerns contribute to awareness disparities between income groups. Compared to low-income individuals, high-income individuals tend to be more concerned about the environment10,11, have greater awareness of air pollution indicators12, and possess higher health protection consciousness13. Thus, high-income individuals are more likely to develop avoidance awareness related to varying air quality information.

Furthermore, financial constraints create avoidance capability disparities between income groups. To mitigate health damage in response to worsening air pollution, people may choose to migrate14, increase short-distance travel15,16, purchase air purifiers17, buy insurance18, and reduce labour supply19. However, engaging in these avoidance behaviours requires sufficient economic resources, providing high-income individuals a clear advantage. Thus, high-income individuals are likely to have greater avoidance capabilities than low-income ones, leading to more pronounced travel avoidance behaviours.

People’s responses to air pollution information depend on a combination of their priorities regarding air pollution and health and their utility maximisation after considering the costs and benefits. Therefore, we propose the following hypotheses:

**Hypothesis 2:** Air pollution information affects avoidance behaviours more significantly in the high-income group than in the low-income group.

**Hypothesis 3:** This disparity arises because high-income individuals have greater avoidance awareness and capability than low-income individuals.

**B. China’s air quality monitoring program and the AQI**

In 2013, China implemented an air quality monitoring program. The primary objective of this initiative is to establish air quality monitoring stations nationwide, enabling real-time air quality monitoring and providing the public with updated information. To support the implementation of the program, the Ministry of Ecology and Environment (formerly the Ministry of Environmental Protection) issued two foundational documents: *Ambient Air Quality Standards (GB 3095-2012)*20 and *Technical Regulation on Ambient Air Quality Index (on trial) (HJ 633-2012)*21*.* These documents provide detailed guidelines on pollutant indicators, monitoring methods, and AQI grading and serve as the cornerstone of air quality monitoring initiatives.

This study focuses on the AQI. According to the *Technical Regulation on Ambient Air Quality Index (on trial) (HJ 633-2012)*21, the AQI is calculated by evaluating six key dimensions: SO2, NO2, CO, O3, PM10, and PM2.5. The AQI is determined by first calculating the Individual Air Quality Index () for each pollutant based on its concentration and then identifying the maximum among these pollutants.

IAQI levels and the corresponding pollutant concentration limits are presented in Table B1. is calculated as follows:

(S1)

where is the IAQI of pollutant *P;*  is the mass concentration value of pollutant *P*; is the high value of the concentration limits of pollutants, corresponding to in Table B1; is the low value of the low-concentration limit of pollutants, corresponding to in Table B1; is the IAQI corresponding to in Table B1; and is the IAQI corresponding to in Table B1.

As previously mentioned, the AQI is defined as the maximum among these pollutants. After calculating the AQI, it is categorised into six levels based on thresholds of 50, 100, 150, 200, and 300: Excellent, Good, Lightly Polluted, Moderately Polluted, Heavily Polluted, and Severely Polluted. Each level is accompanied by specific action recommendations, as shown in Table B2.

**Table B1 Classification of Individual Air Quality Index (IAQI)**

| IAQI | SO2 24-hour average / (μg/m3) | SO2 one-hour average / (μg/m3)a | NO2 24-hour average / (μg/m3) | NO2 one-hour average / (μg/m3)a | PM1024-hour average / (μg/m3) | CO 24-hour average / (mg/m3) | CO one-hour average / (mg/m3)a | O3 one-hour average / (μg/m3) | O3 eight-hour average / (μg/m3) | PM2.5 24-hour average / (μg/m3) |
| --- | --- | --- | --- | --- | --- | --- | --- | --- | --- | --- |
| 0 | 0 | 0 | 0 | 0 | 0 | 0 | 0 | 0 | 0 | 0 |
| 50 | 50 | 150 | 40 | 100 | 50 | 2 | 5 | 160 | 100 | 35 |
| 100 | 150 | 500 | 80 | 200 | 150 | 4 | 10 | 200 | 160 | 75 |
| 150 | 475 | 650 | 180 | 700 | 250 | 14 | 35 | 300 | 215 | 115 |
| 200 | 800 | 800 | 280 | 1200 | 350 | 24 | 60 | 400 | 265 | 150 |
| 300 | 1600 | b | 565 | 2340 | 420 | 36 | 90 | 800 | 800 | 250 |
| 400 | 2100 | b | 750 | 3090 | 500 | 48 | 120 | 1000 | c | 350 |
| 500 | 2620 | b | 940 | 3840 | 600 | 60 | 150 | 1200 | c | 500 |

a One-hour average concentration limits for SO2, NO2, and CO are used in hourly reports only; 24-hour average concentration limits for the corresponding pollutants are used in daily reports.

b If the one-hour average concentration of SO2 is higher than 800μg/m3, then IAQI of SO2 one-hour average is not calculated. IAQI of SO2 is reported based on the 24-hour average concentration.

c If the eight-hour average concentration of O3 is higher than 800 μg/m3, then IAQI of O3 eight-hour average is not calculated. IAQI of O3 is reported based on the one-hour average concentration.

**Table B2 Air Quality Index (AQI) and related information**

| AQI | AQI levels | AQI categories and colours | | Health effect | Recommended activities |
| --- | --- | --- | --- | --- | --- |
| 0–50 | One | Excellent | Green | The air quality is satisfactory, with minimal air pollution. | All people can engage in regular activities without restriction. |
| 51–100 | Two | Good | Yellow | The air quality is acceptable; however, certain pollutants may have a slight impact on the health of a small group of exceptionally sensitive individuals. | A small group of exceptionally sensitive individuals should reduce outdoor activities. |
| 101–150 | Three | Lightly Polluted | Orange | Symptoms in sensitive individuals may worsen slightly, and healthy individuals may experience mild irritation symptoms. | Children, older individuals, and individuals with heart or respiratory system diseases should reduce prolonged and high-intensity outdoor exercises. |
| 151–200 | Four | Moderately Polluted | Red | Further exacerbation of symptoms in sensitive individuals is possible, with potential effects on the cardiovascular and respiratory systems of healthy individuals. | Children, older individuals, and individuals with heart or respiratory system diseases should avoid prolonged and high-intensity outdoor exercises, and the general population should moderately reduce outdoor activities. |
| 201–300 | Five | Heavily Polluted | Purple | Symptoms in individuals with heart and lung diseases are significantly exacerbated, including reduced exercise tolerance, and symptoms are prevalent among the general population. | Children, older individuals, and individuals with heart or lung conditions should remain indoors and refrain from outdoor activities. The general population should reduce outdoor activities. |
| >300 | Six | Severely Polluted | Maroon | Healthy individuals experience reduced exercise tolerance and exhibit noticeable and intense symptoms, predisposing them to the early onset of certain diseases. | Children, older individuals, and individuals with illnesses should stay indoors to avoid physical exertion, while the general population should refrain from outdoor activities. |

**C. Data characteristics**

**C.1 Descriptive statistics**

**Table C1 Descriptive statistics**

| Variable | N | Mean | Median | SD | Min | Max |
| --- | --- | --- | --- | --- | --- | --- |
| AQI | 93777 | 113.6 | 84 | 80.18 | 31 | 381 |
| Travel dummy(0/1) | 93777 | 0.820 | 1 | 0.390 | 0 | 1 |
| Duration (minutes) | 76453 | 88.47 | 70 | 67.92 | 2 | 1020 |
| Discretionary trip (0/1) | 93777 | 0.810 | 1 | 0.390 | 0 | 1 |
| Commuting trip (0/1) | 93777 | 0.430 | 0 | 0.500 | 0 | 1 |
| High-exposure trip (0/1) | 76453 | 0.570 | 1 | 0.490 | 0 | 1 |
| Incomea | 93777 | 2.150 | 2 | 1.130 | 1 | 8 |
| Male(0/1) | 93777 | 0.480 | 0 | 0.500 | 0 | 1 |
| Work_School(0/1) | 93777 | 0.560 | 1 | 0.500 | 0 | 1 |
| Age | 93777 | 46.95 | 48 | 18.06 | 6 | 121b |

a Income is categorised into eight levels: [0,50), [50,100), [100, 150), [150, 200), [200, 250), [250, 300), [300, 500), [500, ∞) (in thousand yuan).

b Individuals aged ≥ 100 years accounts for 0.016% of our sample. According to the 2020 Population Census of the People’s Republic of China, individuals aged ≥ 100 years account for 0.01% of the total population in China. The similarity between these two proportions alleviates concerns regarding outliers.

**C.2 Sample distribution characteristics**

The subsample sizes for each survey day are shown in Fig. C1. Moreover, the AQI data near the cutoffs of 200 and 300 are relatively sparse, which may compromise the reliability of the RD analysis. Consequently, our analysis focuses on cutoffs at AQI levels of 50, 100, and 150.


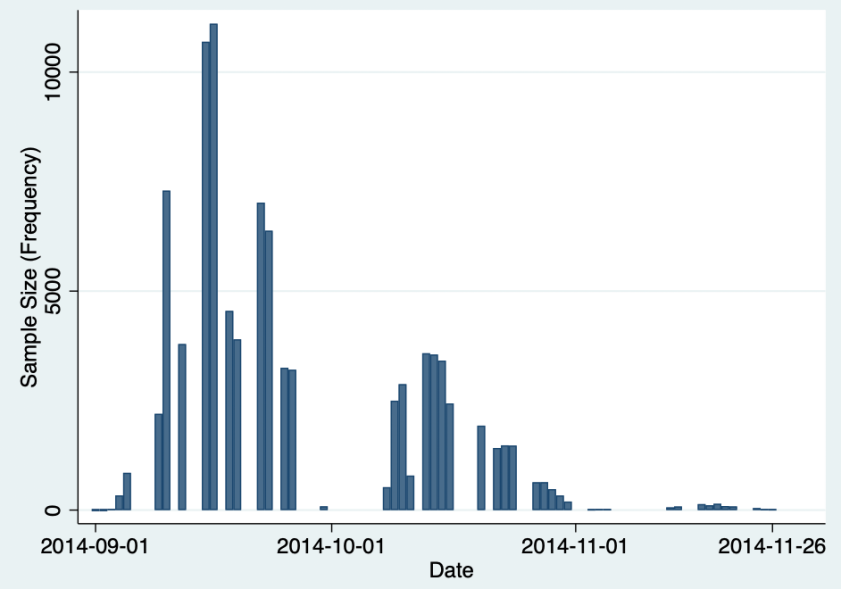


**Fig. C1: Sample distribution histogram based on survey date.**

**D. Robustness tests**

We conduct a series of robustness tests to address potential concerns regarding the baseline regression results using the RD method. RD design validity relies on the assumption that individuals whose running variable values are in the left bin of the cutoff and those whose running variable values are in the right bin are comparable. This assumption cannot be tested directly. However, if this assumption holds, we would expect the pre-determined covariates of the two groups to have no difference, and the distribution of observations would be smooth across the cutoff. Therefore, we first validate the RD design by examining the characteristics of the covariates. Second, we examine the distribution of the AQI to ensure a lack of manipulation above or below the cutoff value. Finally, as the running variable is discrete, we use a local randomization approach to verify the robustness of the baseline regression results.

**D.1 Covariate balance test**

For the balance test, we compare the covariates of observations just below and above the cutoff. We replace the dependent variable in the baseline regression with the covariates indicating gender (*Male*), age (*Age*), and whether the respondent is working or attending school (*Work_School*) and re-estimated Eq. (1) - (3) in the Main Text. As shown in Table D1, the results reveal no significant changes in the cutoffs and the estimates are small in magnitude. This suggests that travel avoidance behaviours are not driven by other factors.

**Table D1 Covariate characteristics at cutoffs**

| Regression | (1) | (2) | (3) |
| --- | --- | --- | --- |
| Variables | Male | Age | Work_School |
|  |  |  |  |
| Cutoff = 50 | 0.0214 | 2.116 | -0.194 |
|  | (0.0802) | (2.988) | (0.120) |
| Cutoff = 100 | -0.0223 | -2.025 | -0.0606 |
|  | (0.0602) | (3.016) | (0.0681) |
| Cutoff = 150 | -0.00294 | -1.431 | 0.0200 |
|  | (0.0276) | (1.030) | (0.0279) |
| **COV** | No | No | No |
| **Observations** |  |  |  |
| Cutoff = 50 | 11577 | 11577 | 10940 |
| Cutoff = 100 | 19000 | 5609 | 15101 |
| Cutoff = 150 | 20222 | 16323 | 16323 |
| **Bandwidth** |  |  |  |
| Cutoff = 50 | 7.76 | 7.37 | 5.84 |
| Cutoff = 100 | 12.03 | 7.33 | 9.51 |
| Cutoff = 150 | 39.31 | 35.56 | 37.88 |

* p < 0.1; ** p < 0.05; *** p < 0.01.

The results are obtained using a regression-discontinuity design with multiple cutoffs proposed by Cattaneo et al.23. Coefficients are estimated at three cutoffs. COV indicates whether covariates (*Male*, *Age*, and *Work_School*) are included; observations represent the sample size for the local regression analysis around each cutoff; and bandwidth denotes the window size on the left and right sides of the cutoff, determined using the optimal mean squared error method, with equal bandwidths selected for both sides.

As shown in Figure D1, no significant changes are observed in the covariates when the cutoffs are crossed.

**A**
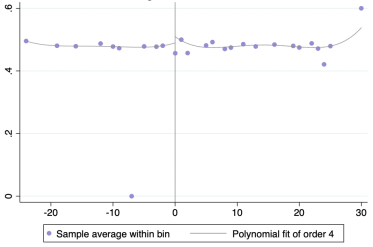
**B**
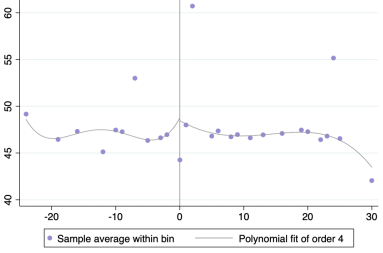
**C**
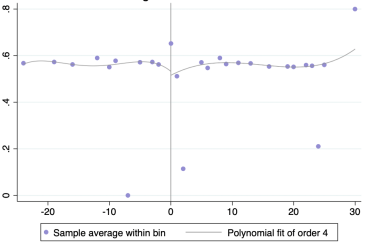


**Fig. D1: Covariates distribution: A** *Male*, **B** *Age*, **C** *Work_School*. We plot the distributions and fitted lines of the covariates corresponding to the driving variable. Specifically, we retain samples with AQI < 200 and assign each of them to the closest cutoff . Subsequently, we calculate the standardised driving variable (AQI-) and use it as the horizontal axis. Circles represent the mean values of the covariates within each bin of the standardised driving variables. Lines represent fourth-order polynomial fits.

**D.2 Manipulation test**

Manipulation test reveals whether individuals can manipulate their running variables to control their treatment status. If they can, the treatment status cannot be considered to be as good as random, and the RD results cannot be considered valid. In our sample, individuals can not perform this manipulation because they can not decide on which day they are interviewed in the Beijing Urban Transportation Comprehensive Survey.

To provide empirical evidence, we conduct a manipulation test for the AQI on the survey days. As shown in Figure D2, no discontinuity is observed in the distribution of the AQI around the cutoff value.


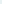

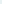

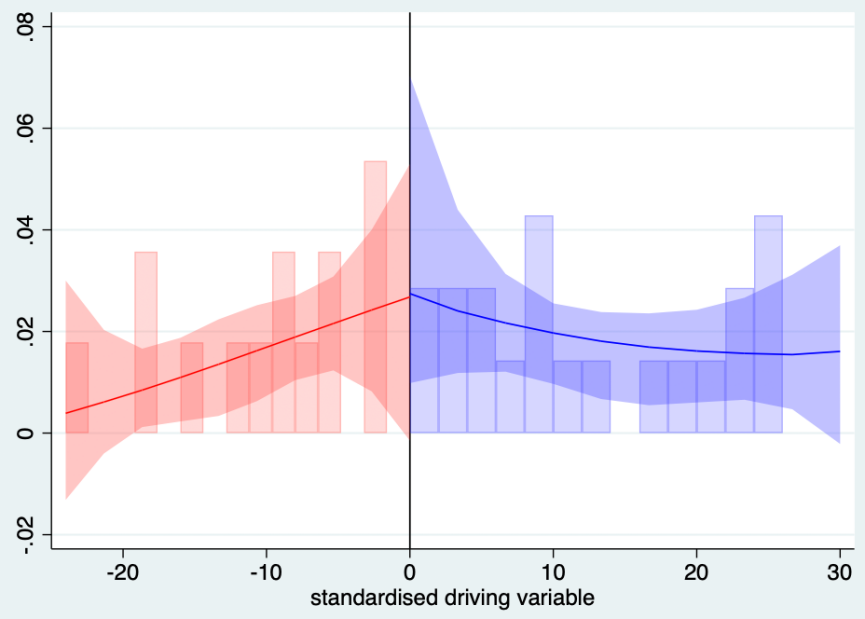


**Fig. D2: Manipulation test: standardised driving variable distribution.** We treat each survey day as an observation. We retain samples with AQI < 200 and assign them to the closest cutoff *.* Subsequently, we calculate the standardised driving variable and use it as the horizontal axis. Finally, we plot the density estimates and their confidence intervals around the cutoff using local polynomial density estimators.

**D.3 Local randomization approach to RD analysis**

As individuals in the sample are interviewed over 47 survey days in the same city, our sample has 47 AQI values, resulting in “mass points”22. When the distribution of the running variable is discrete with few mass points, a continuity-based RD design may introduce a bias because the conventional continuity-based approach approximates the regression function at the cutoff by using observations near it. However, this method introduces an extrapolation error that diminishes only if the sample size is sufficiently large. Therefore, this method might be inadequate when the sample size is small.

To address this concern, we follow Cattaneo et al.22 and use a local randomization approach as an alternative. Instead of assuming that the unknown regression functions are continuous at the cutoff, the local randomization approach assumes the existence of a small window around the cutoff; for all units whose scores fall in that window, placement above or below the cutoff is assigned randomly. This approach offers an advantage by minimising extrapolation and avoiding the use of smoothing methods. Local randomization is often an effective alternative when running variable is discrete. Moreover, this approach generally does not require window selection, as the smallest window is well defined and typically has sufficient observations. Therefore, we select the nearest AQI values on each side of the cutoff as the endpoints of the window for the local randomization estimation.

The results are shown in Table D2, Column 1 presents the effect of air quality information on travel probability, and Column 2 presents the effect on travel duration. When air pollution levels shift from good to lightly polluted, probability of choosing to travel decreases by 12.1% (p < 5%). When air pollution levels shift from lightly polluted to moderately polluted, the probability of choosing to travel decreases by 6.4% (p < 1%). These results are statistically and economically similar to the baseline results. However, travel duration is not influenced by air quality information under the local randomization framework. Therefore, interpreting the impact on travel duration requires additional caution.

**Table D2 Local randomization analysis with discrete scores**

| Regression | (1) | (2) |
| --- | --- | --- |
| Variables | Travel dummy | Duration |
| **Diff. in means** |  |  |
| Cutoff = 50 | 0.005 | -6.594 |
| Cutoff = 100 | -0.121 | -8.060 |
| Cutoff = 150 | -0.064 | -4.134 |
| **P (Finite sample)** |  |  |
| Cutoff = 50 | 1.000 | 0.403 |
| Cutoff = 100 | 0.018 | 0.397 |
| Cutoff = 150 | 0.000 | 0.215 |
| **P (Large sample)** |  |  |
| Cutoff = 50 | 0.912 | 0.420 |
| Cutoff = 100 | 0.034 | 0.391 |
| Cutoff = 150 | 0.000 | 0.219 |
| Kernel | uniform | uniform |
| **Eff. Observations** |  |  |
| Cutoff = 50 | 10779 | 8850 |
| Cutoff = 100 | 400 | 342 |
| Cutoff = 150 | 2330 | 1902 |
| **Window** |  |  |
| Cutoff = 50 | [-2,1] | [-2,1] |
| Cutoff = 100 | [-2,2] | [-2,2] |
| Cutoff = 150 | [-9,5] | [-9,5] |

The results are obtained using the local randomization approach proposed by Cattaneo et al.22. Diff. in means presents the estimated coefficients. P indicates the estimated p-value. We select the nearest AQI values on each side of the cutoff as the endpoints of the window for local randomization estimation.

**E. Regression results**

**Table E1 Heterogeneous effects of air quality information on travel behaviours by income group**

| Regression | (1) | (2) | (3) | (4) |
| --- | --- | --- | --- | --- |
| Variables | Travel dummy | | Duration | |
|  | Low Income | High Income | Low Income | High Income |
| Cutoff = 50 | 0.137 | 0.0614 | 2.787 | -25.94 |
|  | (0.0929) | (0.120) | (14.65) | (30.69) |
| Cutoff = 100 | 0.0725 | -0.179*** | -18.07 | -24.86** |
|  | (0.0509) | (0.0669) | (18.39) | (12.47) |
| Cutoff = 150 | -0.0605** | -0.0958*** | 2.725 | -2.484 |
|  | (0.0252) | (0.0349) | (4.037) | (7.383) |
| **COV** | Yes | Yes | Yes | Yes |
| **Observations** |  |  |  |  |
| Cutoff = 50 | 8555 | 3021 | 6925 | 2547 |
| Cutoff = 100 | 4082 | 1527 | 3326 | 3985 |
| Cutoff = 150 | 11904 | 4419 | 20788 | 3678 |
| **[lh, rh]** |  |  |  |  |
| Cutoff = 50 | 6.28 | 6.46 | 7.74 | 6.33 |
| Cutoff = 100 | 6.40 | 6.71 | 6.15 | 13.20 |
| Cutoff = 150 | 32.44 | 32.93 | 53.61 | 37.87 |

* p < 0.1; ** p < 0.05; *** p < 0.01.

The results are obtained using a regression-discontinuity design with multiple cutoffs proposed by Cattaneo et al.23. Coefficients are estimated at three cutoffs. COV indicates whether covariates (*Male*, *Age*, and *Work_School*) are included; observations represent the sample size for the local regression analysis around each cutoff; and bandwidth denotes the window size on the left and right sides of the cutoff, determined using the optimal mean squared error method, with equal bandwidths selected for both sides. Columns (1) and (2) present the effect of air quality information on travel probability for the low- and high-income groups, and Columns (3) and (4) present the effect of air quality information on travel duration for the low- and high-income groups. The results indicate that the high-income group exhibites stronger reductions in both travel probability and duration than the low-income group under poor air quality information.

**Table E2 Differences in avoidance awareness by income group**

| Regression | (1) | (2) |
| --- | --- | --- |
| Variables | Discretionary trip | |
|  | Low Income | High Income |
| Cutoff = 50 | 0.149 | 0.0744 |
|  | (0.0928) | (0.120) |
| Cutoff = 100 | 0.0791 | -0.188*** |
|  | (0.0497) | (0.0674) |
| Cutoff = 150 | -0.0676*** | -0.0974*** |
|  | (0.0258) | (0.0356) |
| **COV** | Yes | Yes |
| **Observations** |  |  |
| Cutoff = 50 | 8555 | 3021 |
| Cutoff = 100 | 4082 | 1527 |
| Cutoff = 150 | 11904 | 4419 |
| **Bandwidth** |  |  |
| Cutoff = 50 | 6.22 | 6.44 |
| Cutoff = 100 | 6.41 | 6.51 |
| Cutoff = 150 | 31.23 | 32.23 |

* p < 0.1; ** p < 0.05; *** p < 0.01.

The results are obtained using a regression-discontinuity design with multiple cutoffs proposed by Cattaneo et al.23. Coefficients are estimated at three cutoffs. COV indicates whether covariates (*Male*, *Age*, and *Work_School*) are included; observations represent the sample size for the local regression analysis around each cutoff; and bandwidth denotes the window size on the left and right sides of the cutoff, determined using the optimal mean squared error method, with equal bandwidths selected for both sides. Columns (1) and (2) present the effect of air quality information on discretionary trips among the low- and high-income groups, respectively. The results indicate that poor air quality information reduces discretionary trips among both high- and low-income groups, with a greater effect in the high-income group.

**Table E3 Differences in avoidance capability by income group**

| Regression | (3) | (4) | (1) | (2) |
| --- | --- | --- | --- | --- |
| Variables | Commuting trip | | High-exposure trip | |
|  | Low Income | High Income | Low Income | High Income |
| Cutoff = 50 | 0.0202 | -0.278** | -0.0154 | 0.312 |
|  | (0.0493) | (0.122) | (0.108) | (0.203) |
| Cutoff = 100 | 0.0847 | -0.155*** | -0.615*** | 0.154 |
|  | (0.124) | (0.0561) | (0.191) | (0.101) |
| Cutoff = 150 | -0.0117 | -0.0111 | -0.724*** | -0.0716 |
|  | (0.0234) | (0.0351) | (0.131) | (0.0516) |
| **COV** | Yes | Yes | Yes | Yes |
| **Observations** |  |  |  |  |
| Cutoff = 50 | 8647 | 3021 | 6943 | 2345 |
| Cutoff = 100 | 4082 | 5729 | 2639 | 3126 |
| Cutoff = 150 | 11904 | 5437 | 5531 | 3678 |
| **Bandwidth** |  |  |  |  |
| Cutoff = 50 | 9.58 | 6.78 | 8.14 | 5.35 |
| Cutoff = 100 | 6.45 | 17.66 | 4.51 | 10.87 |
| Cutoff = 150 | 37.66 | 40.10 | 22.04 | 38.17 |

* p < 0.1; ** p < 0.05; *** p < 0.01.

The results are obtained using a regression-discontinuity design with multiple cutoffs proposed by Cattaneo et al.23. Coefficients are estimated at three cutoffs. COV indicates whether covariates (*Male*, *Age*, and *Work_School*) are included; observations represent the sample size for the local regression analysis around each cutoff; and bandwidth denotes the window size on the left and right sides of the cutoff, determined using the optimal mean squared error method, with equal bandwidths selected for both sides. Columns (1) and (2) present the effect of air quality information on commuting trips for the low- and high-income groups, and Columns (3) and (4) present the effect of air quality information on high-exposure trips for the low- and high-income groups. The results indicate that poor air quality information reduces commuting trips in the high-income group but has no significant effect on the low-income group. Moreover, poor air quality information reduces high-exposure trips in the low-income group but has no significant effect on the high-income group.

**F. Source of Data on Dissemination of Air Quality Information to the Public**

<https://www.gov.cn/gzdt/2013-01/26/content_2320174.htm>


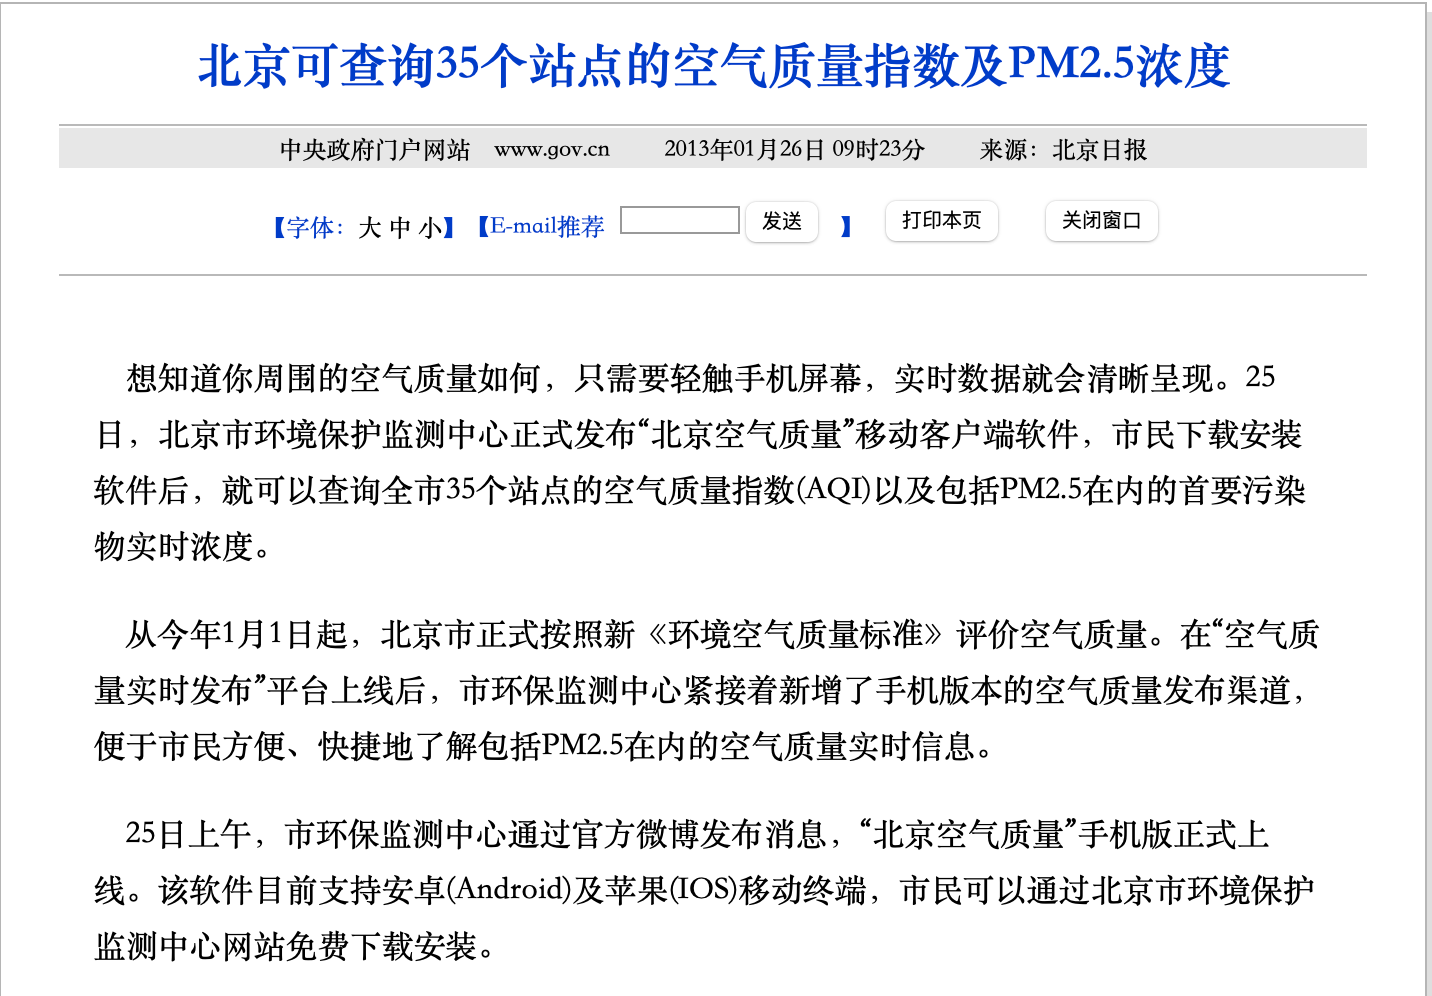


**References**

1. Guo, Y. et al*.* Factors affecting parent’s perception on air quality -From the individual to the community level. *Int. J. Environ. Res. Public Health* **13,** 493 (2016). [10.3390/ijerph13050493](https://doi.org/10.3390/ijerph13050493), PubMed: [27187432](https://www.ncbi.nlm.nih.gov/pubmed/27187432).
2. Barwick, P. J., Li, S., Lin, L. & Zou, E. Y. From fog to smog: The value of pollution information. *Am. Econ. Rev.* **114,** 1338–1381 (2024). [10.1257/aer.20200956](https://doi.org/10.1257/aer.20200956).
3. Wang, Y., Sun, M., Yang, X. & Yuan, X. Public awareness and willingness to pay for tackling smog pollution in China: A case study. *J. Clean. Prod.* **112,** 1627–1634 (2016). [10.1016/j.jclepro.2015.04.135](https://doi.org/10.1016/j.jclepro.2015.04.135).
4. Gao, X., Song, R. & Timmins, C. Information, migration, and the value of clean air. *J. Dev. Econ.* **163** (2023)**.** .
5. Graff Zivin, J. G. & Neidell, M. Days of haze: Environmental information disclosure and intertemporal avoidance behavior. *J. Environ. Econ. Manage.* **58,** 119–128 (2009). [10.1016/j.jeem.2009.03.001](https://doi.org/10.1016/j.jeem.2009.03.001).
6. Ward, A. L. S. & Beatty, T. K. M. Who responds to air quality alerts? *Environ. Resour. Econ.* **65,** 487–511 (2016). [10.1007/s10640-015-9915-z](https://doi.org/10.1007/s10640-015-9915-z).
7. Dong, D., Xu, X., Xu, W. & Xie, J. The relationship between the actual level of air pollution and residents’ concern about air pollution: Evidence from Shanghai, China. *Int. J. Environ. Res. Public Health* **16,** 4784 (2019). [10.3390/ijerph16234784](https://doi.org/10.3390/ijerph16234784), PubMed: [31795301](https://www.ncbi.nlm.nih.gov/pubmed/31795301).
8. Wu, Y., Zhang, L., Wang, J. & Mou, Y. Communicating air quality index information: Effects of different styles on individuals’ risk perception and precaution intention. *Int. J. Environ. Res. Public Health* **18,** 10542 (2021). [10.3390/ijerph181910542](https://doi.org/10.3390/ijerph181910542), PubMed: [34639842](https://www.ncbi.nlm.nih.gov/pubmed/34639842).
9. Yang, G., Ju, Y. & Ni, W. Does the air pollution level information matter in public perception? Insights from China. *J. Environ. Manage.* **349,** 119582 (2024). [10.1016/j.jenvman.2023.119582](https://doi.org/10.1016/j.jenvman.2023.119582), PubMed: [37988894](https://www.ncbi.nlm.nih.gov/pubmed/37988894).
10. Fairbrother, M. Rich people, poor people, and environmental concern: Evidence across nations and time. *Eur. Sociol. Rev.* **29,** 910–922 (2013). [10.1093/esr/jcs068](https://doi.org/10.1093/esr/jcs068).
11. Sulemana, I., James, H. S. & Valdivia, C. B. Perceived socioeconomic status as a predictor of environmental concern in African and developed countries. *J. Environ. Psychol.* **46,** 83–95 (2016). [10.1016/j.jenvp.2016.04.002](https://doi.org/10.1016/j.jenvp.2016.04.002).
12. Liu, X. et al. Public’s health risk awareness on urban air pollution in Chinese megacities: The cases of Shanghai, Wuhan and Nanchang. *Int. J. Environ. Res. Public Health* **13,** 845 (2016). [10.3390/ijerph13090845](https://doi.org/10.3390/ijerph13090845), PubMed: [27571088](https://www.ncbi.nlm.nih.gov/pubmed/27571088).
13. Liao, L., Du, M. & Chen, Z. Environmental pollution and socioeconomic health inequality: Evidence from China. *Sustain. Cities Soc.* **95** (2023)**.** .
14. Jessoe, K., Manning, D. T. & Taylor, J. E. Climate change and labour allocation in rural Mexico: Evidence from annual fluctuations in weather. *Econ. J.* **128,** 230–261 (2018). [10.1111/ecoj.12448](https://doi.org/10.1111/ecoj.12448).
15. Chen, S., Chen, Y., Lei, Z. & Tan-Soo, J.-S. Impact of air pollution on short-term movements: Evidence from air travels in China. *J. Econ. Geogr.* **20,** 939–968 (2020). [10.1093/jeg/lbaa005](https://doi.org/10.1093/jeg/lbaa005).
16. Chen, S., Chen, Y., Lei, Z. & Tan-Soo, J.-S. Chasing clean air: Pollution-induced travels in China. *J. Assoc. Environ. Resour. Econ.* **8,** 59–89 (2021). [10.1086/711476](https://doi.org/10.1086/711476).
17. Ito, K. & Zhang, S. Willingness to pay for clean air: Evidence from air purifier markets in China. *J. Polit. Econ.* **128,** 1627–1672 (2020). [10.1086/705554](https://doi.org/10.1086/705554).
18. Chang, T. Y., Huang, W. & Wang, Y. Something in the air: Pollution and the demand for health insurance. *Rev. Econ. Stud.* **85,** 1609–1634 (2018). [10.1093/restud/rdy016](https://doi.org/10.1093/restud/rdy016)*.*
19. Fan, M. & Grainger, C. The impact of air pollution on labor supply in China. *Sustainability* **15,** 13082 (2023). [10.3390/su151713082](https://doi.org/10.3390/su151713082).
20. Ministry of Environmental Protection of the People’s Republic of China. *Ambient Air Quality Standards (GB3095-2012)* (China Environmental Science Press,Beijing, 2012).
21. Ministry of Environmental Protection of the People’s Republic of China. *Technical Regulation on Ambient Air Quality Index (on trial)(HJ633-2012)* (China Environmental Science Press,Beijing, 2012).
22. Cattaneo, M. D., Idrobo, N. & Titiunik, R. *A Practical Introduction to Regression Discontinuity Designs: Extensions* (Cambridge Univ. Press, Cambridge, 2024). [10.1017/9781009441896](https://doi.org/10.1017/9781009441896).
23. Cattaneo, M. D., Titiunik, R. & Vazquez-Bare, G. Analysis of regression-discontinuity designs with multiple cutoffs or multiple scores*. Stata J.* **20,** 866–891 (2020). [10.1177/1536867X20976320](https://doi.org/10.1177/1536867X20976320).
